# Supplementary material for: Construction of triangular metallomacrocycles: [M3(1,2-bis(2,2′∶6′,2″-terpyridin-4-yl-ethynyl)benzene)3] [M = Ru(ii), Fe(ii), 2Ru(ii)Fe(ii)]
Source: Royal Society of Chemistry journal article supplement (doi:10.1039/b409348h), 2004-12-16
Supplement: b409348h-s1.pdf [file b409348h-s1.pdf]

#Supplementary Material (ESI) for Chemical Communications

#This journal is © The Royal Society of Chemistry 2005

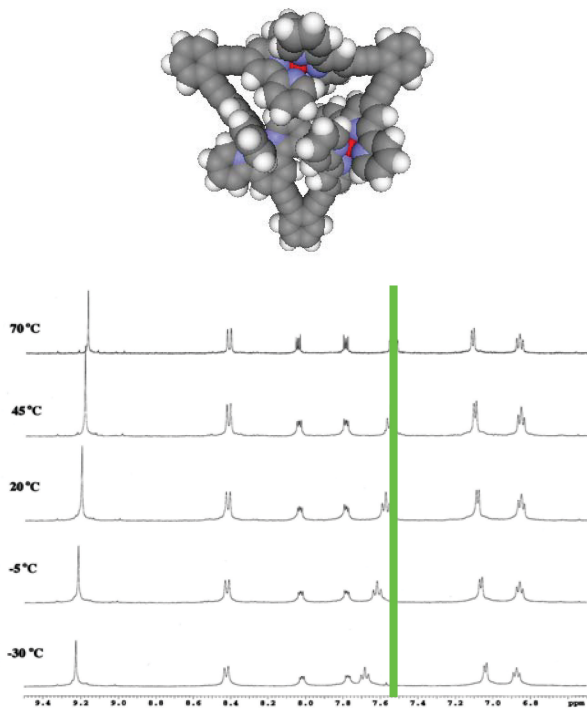

**Fig. S1.** CPK representation of **6** (upper) and variable temperature  $^1\text{H}$  NMR spectra (below) of complex **5**.
